# Supplementary material for: Synthesis of ordered mesoporous carbon doped with carbon nanotubes and a new strategy to use it as a support for Pt electrocatalysts
Source: Royal Society of Chemistry journal article supplement (doi:10.1039/c3ta13732e), 2013-12-04
Supplement: c3ta13732e.pdf [file c3ta13732e.pdf]

## Synthesis of ordered mesoporous carbon doped with carbon nanotubes and a new strategy as supports of Pt electrocatalysts

Xiaoxue Zhang<sup>a</sup>, Jianping He<sup>a</sup>\*, Tao Wang<sup>b</sup>, Mingzhu Liu<sup>a</sup>, Hairong Xue<sup>a</sup>, Hu Guo<sup>a</sup>

<sup>a</sup> College of Material Science and Technology, Nanjing University of Aeronautics and  
Astronautics, Yudao Street 29, 210016 Nanjing, PR China

<sup>b</sup> World Premier International Research Center for Materials Nanoarchitectonics,  
National Institute for Materials Science, 1-1 Namiki, Tsukuba, Ibaraki 305-0044,  
Japan.

\*Corresponding author. Tel: +86 25 52112900; Fax: +86 25 52112626.

E-mail address: jianph@nuaa.edu.cn

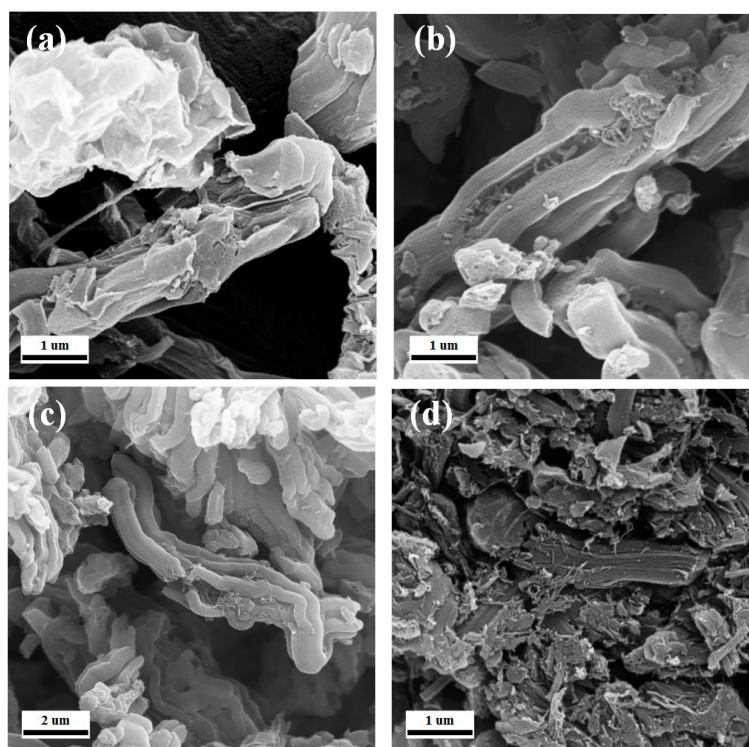

**Fig. S1** SEM images of CNTs-OMC-y samples: (a) CNTs-OMC-1; (b) CNTs-OMC-2; (c)  
CNTs-OMC-3; (d) CNTs-OMC-4

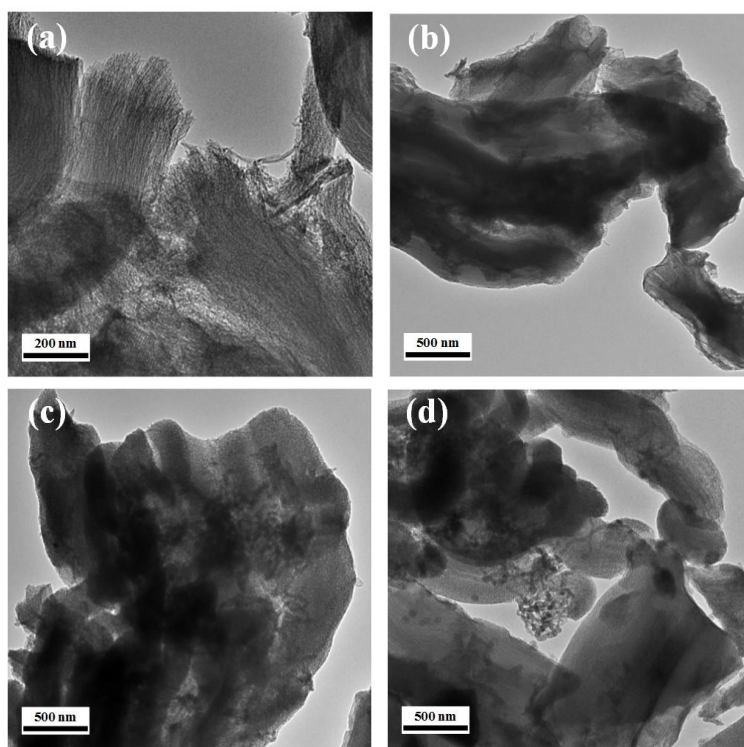

**Fig. S2** Low-magnification TEM images of CNTs-OMC-y samples: (a) CNTs-OMC-1; (b) CNTs-OMC-2; (c) CNTs-OMC-3; (d) CNTs-OMC-4

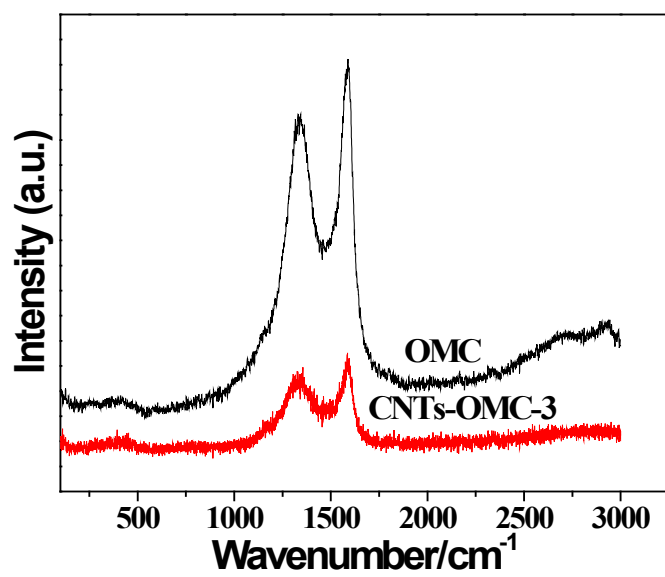

Fig. S3 Raman spectra of OMC and CNTs-OMC-3

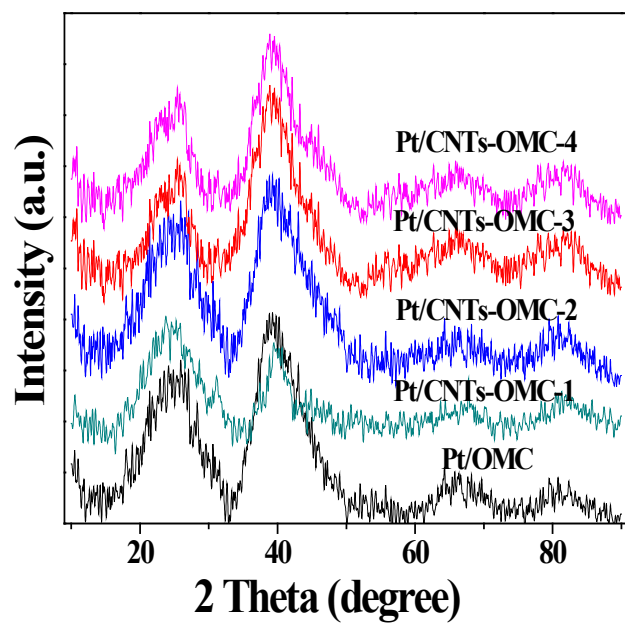

**Fig. S4** Wide-angle XRD images of Pt/CNTs-OMC-y catalysts

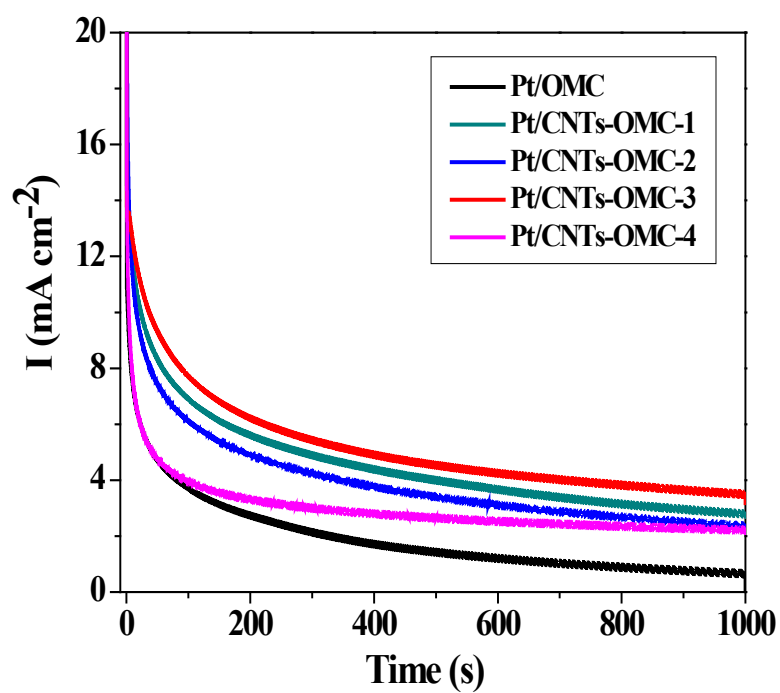

**Fig. S5** Chronoamperometric curves of Pt/OMC and Pt/CNTs-OMC-y catalysts in 1.0 mol L<sup>-1</sup> H<sub>2</sub>SO<sub>4</sub> + 2.0 mol L<sup>-1</sup> CH<sub>3</sub>OH
